# Supplementary material for: Synthesis of l-aspartic acid-based bimetallic hybrid nanoflowers to immobilize snailase for the production of rare ginsenoside compound K
Source: Royal Society of Chemistry journal article supplement (doi:10.1039/d3tb00013c), 2023-01-01
Supplement: d3tb00013c1.pdf [file d3tb00013c1.pdf]

## Support Information

### **Synthesis of L-aspartic acid-based bimetallic hybrid nanoflowers to immobilization snailase for production of rare ginsenoside**

#### **Compound K**

*DuoduoTian*<sup>a</sup>, *Zhansheng Wu*<sup>a,\*</sup>, *Xiaochen Liu*<sup>a</sup>, *Zhuo Tu*<sup>a</sup>, *Daidi Fan*<sup>b</sup>, *Runze Li*<sup>a</sup>,  
*Yiran Lan*<sup>a</sup>

<sup>a</sup> School of Environmental and Chemical Engineering, Xi'an Key Laboratory of Textile Chemical Engineering Auxiliaries, Xi'an Polytechnic University, Xi'an 710048, P.R. China

<sup>b</sup> School of Chemical Engineering, Shaanxi Key Laboratory of Degradable Biomedical Materials, Northwest University, Xi'an 710069, PR China

\* E-mail: wuzhans@xpu.edu.cn (Z. Wu).

Tel: 86029 62779279, Fax: 86029 62779281

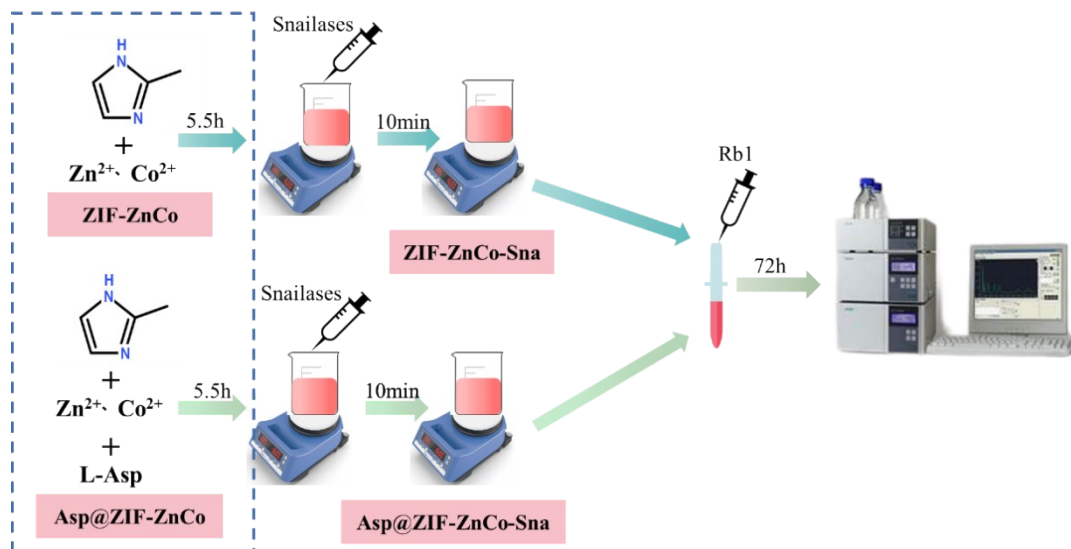

Figure. S1 Schematic diagram of the ZIF-ZnCo, ZIF-ZnCo-Sna, Asp@ZIF-ZnCo and Asp@ZIF-ZnCo-Sna material preparation process

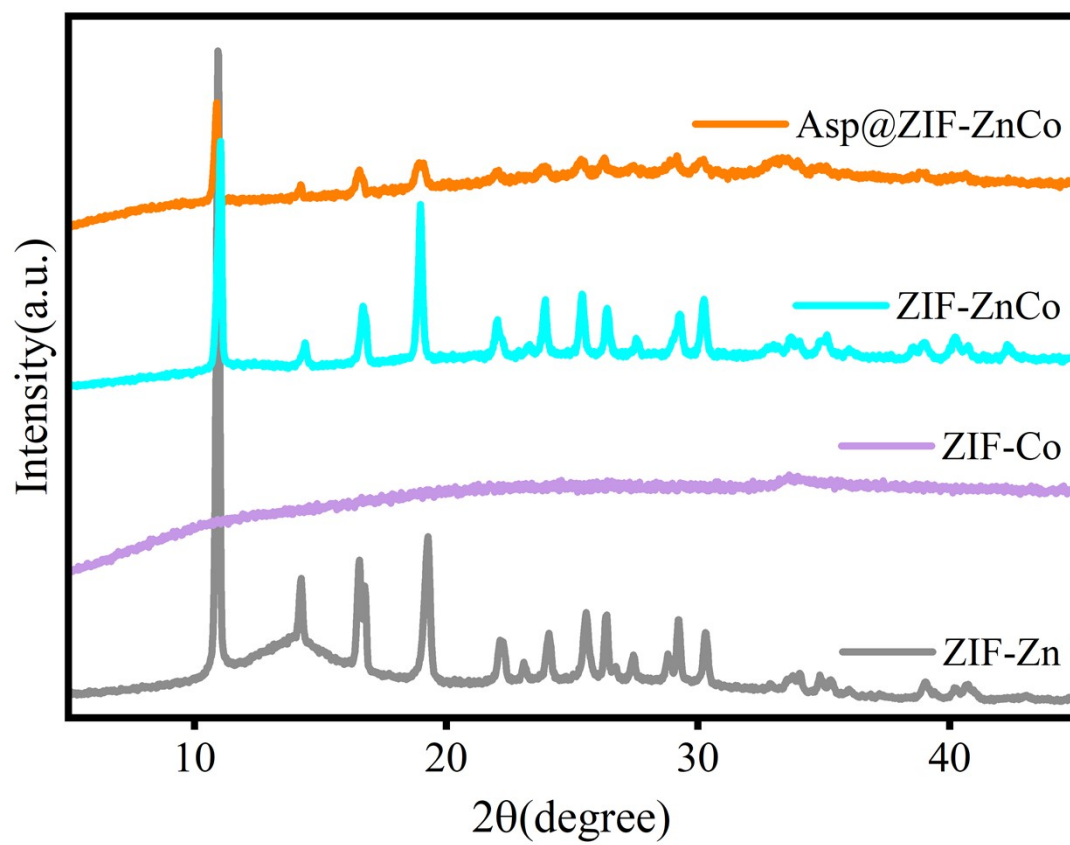

Figure. S2 XRD of ZIF-Zn, ZIF-Co, ZIF-ZnCo, Asp@ZIF-ZnCo

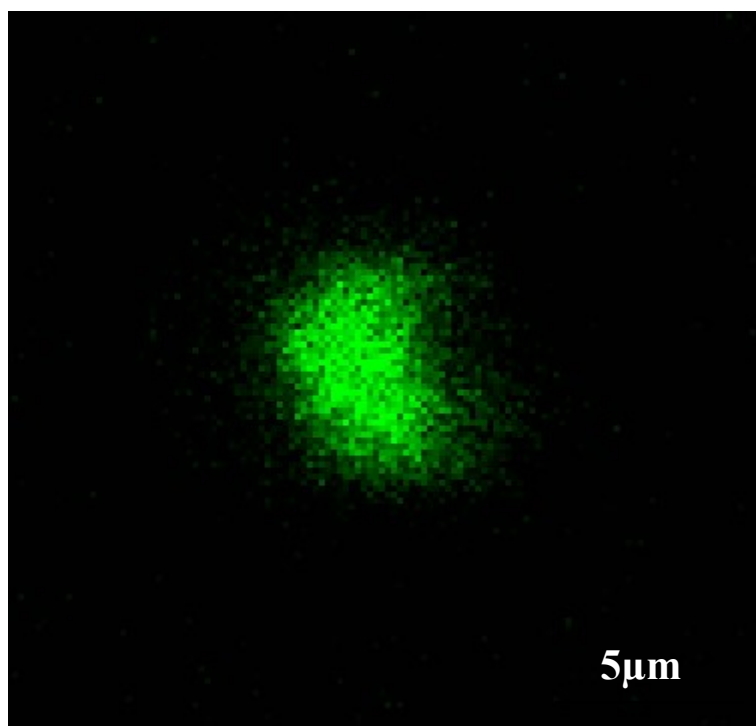

**Figure. S3** FITC images of ZIF-ZnCo-Sna

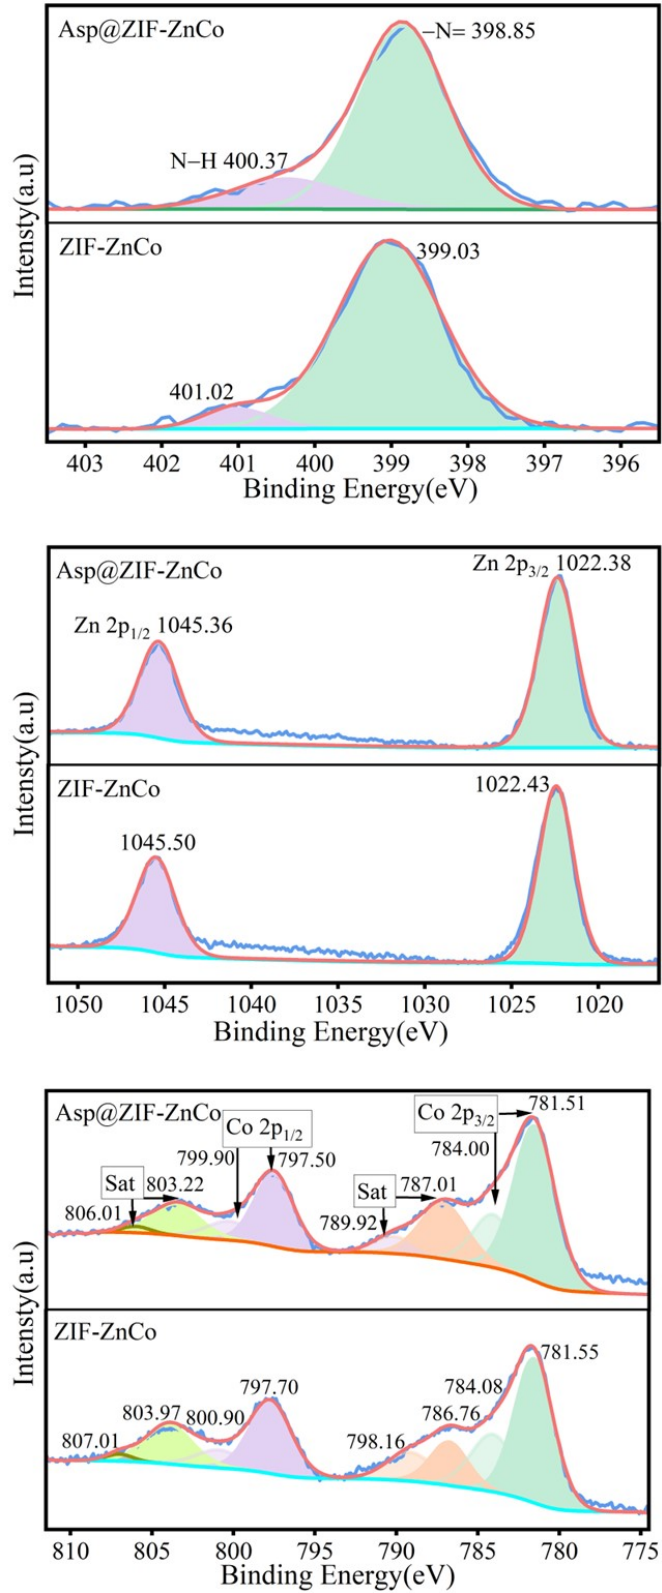

**Figure. S4** ZIF-ZnCo and Asp@ZIF-ZnCo were scanned with XPS extended spectra for the N 1s, Zn 2p and Co 2p regions.

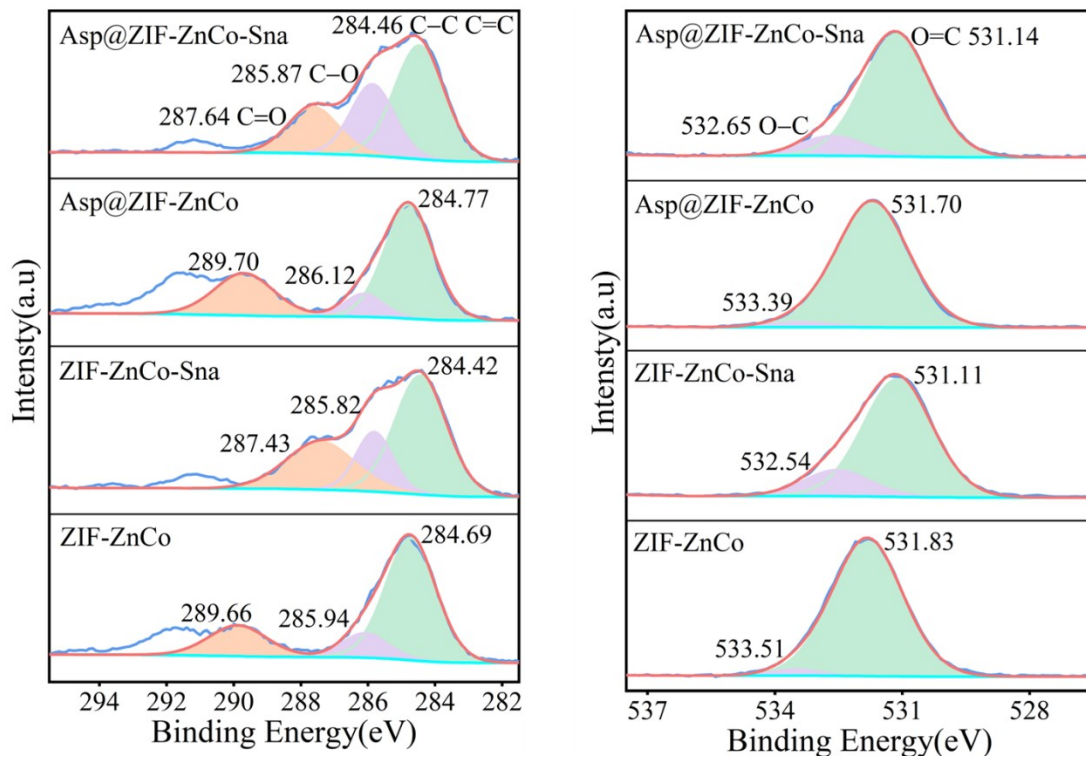

**Figure. S5** Extended XPS spectral scans of the C 1s and O 1s regions for ZIF-ZnCo, ZIF-ZnCo-Sna, Asp@ZIF-ZnCo, Asp@ZIF-ZnCo-Sna.

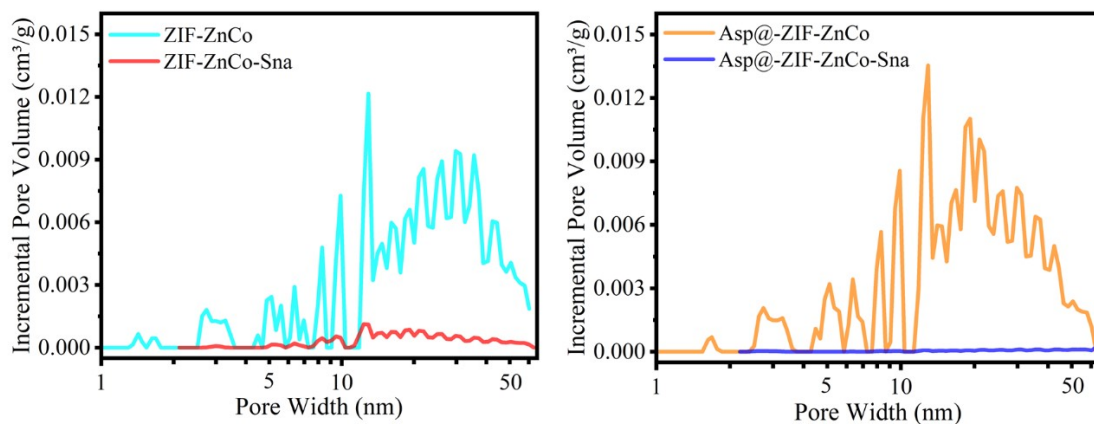

**Figure. S6 DFT simulation of ZIF-ZnCo, ZIF-ZnCo-Sna (a), Asp@ZIF-ZnCo, Asp@ZIF-ZnCo-Sna**

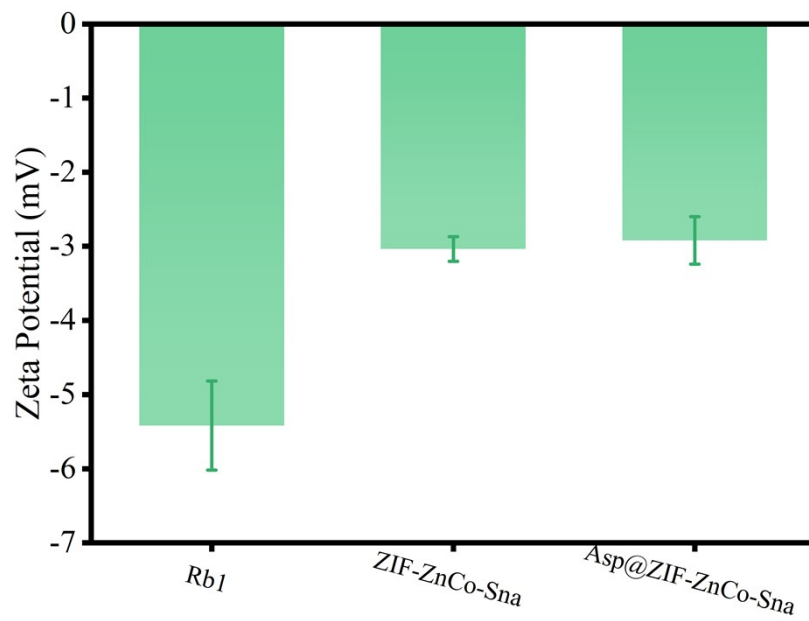

**Figure. S7** Snailase, ZIF-ZnCo-Sna, Asp@ZIF-ZnCo-Sna zeta potential



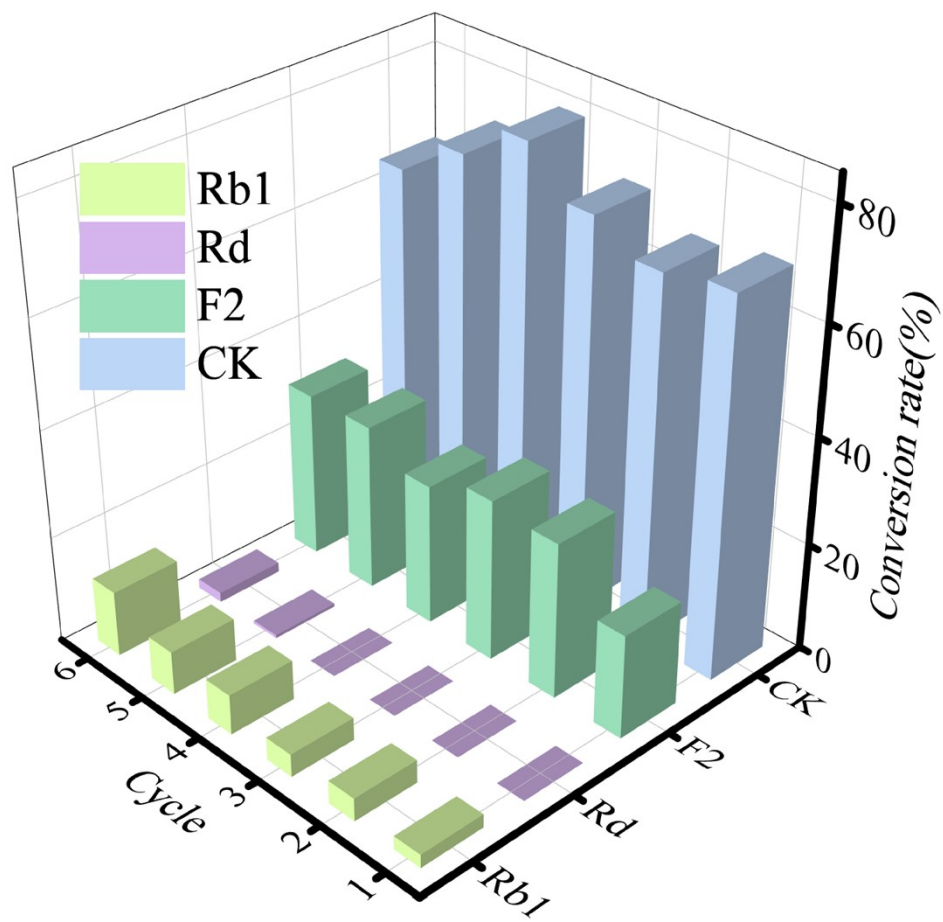

Figure. S8 Catalytic efficiency of Asp@ZIF-ZnCo-Sna on Rb1

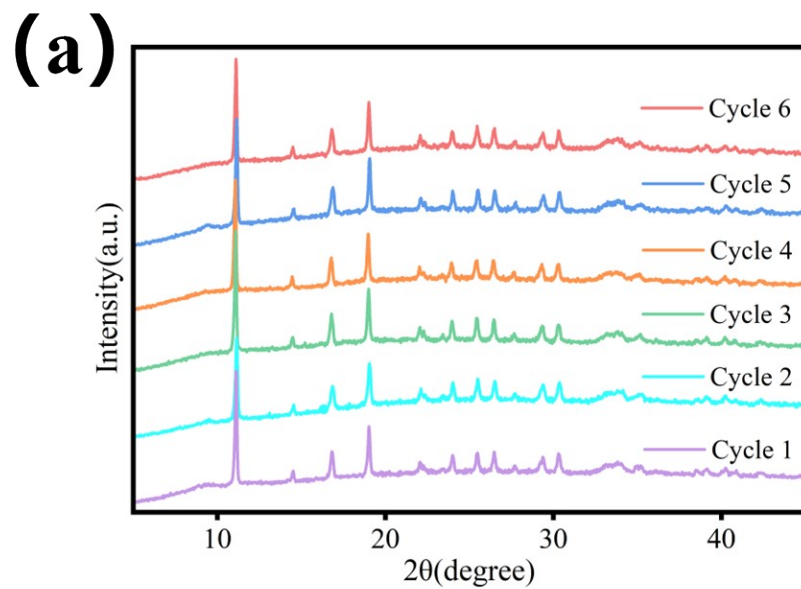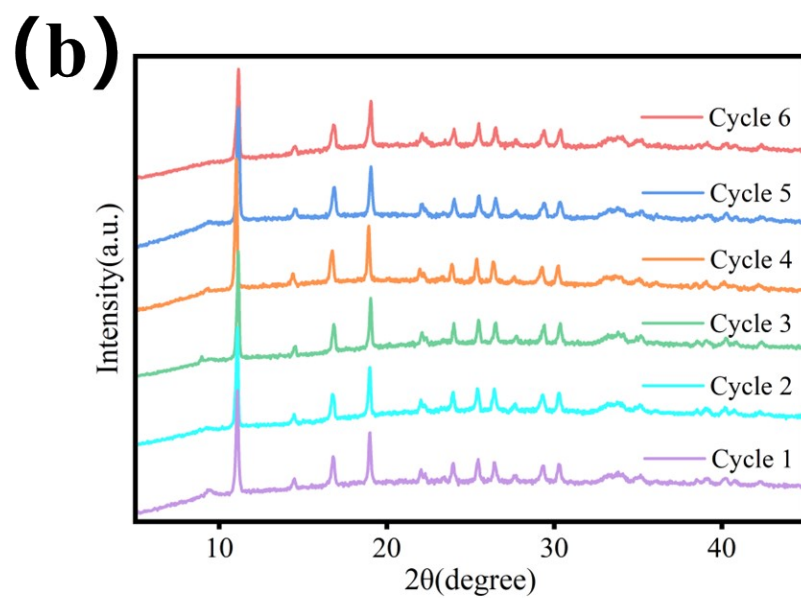

Figure. S9 XRD of cycles of ZIF-ZnCo-Sna (a) and Asp@ZIF-ZnCo-Sna (b).

**Table S1. Temperature stability parameters for free and immobilised enzymes**

| °C | Asp@ZIF-ZnCo-Sna |          | ZIF-ZnCo-Sna |          | Sna      |          |
|----|------------------|----------|--------------|----------|----------|----------|
|    | Mean             | Standard | Mean         | Standard | Mean     | Standard |
| 30 | 99.59489         | 0.35132  | 98.39943     | 1.35071  | 99.50839 | 0.60428  |
| 40 | 98.45228         | 0.96731  | 86.08292     | 2.55268  | 95.73881 | 0.44299  |
| 50 | 73.83267         | 2.70924  | 61.59583     | 1.35936  | 83.85455 | 0.49087  |
| 60 | 70.76023         | 1.35338  | 59.0751      | 2.045    | 30.27465 | 0.37629  |
| 70 | 65.39056         | 2.04099  | 52.59322     | 1.73636  | 8.60674  | 0.37629  |
| 80 | 49.51407         | 1.13453  | 42.87041     | 2.4357   | 4.29042  | 0.53911  |

**Table S2. pH stability parameters for free and immobilised enzymes**

| pH | Asp@ZIF-ZnCo-Sna |          | ZIF-ZnCo-Sna |          | Sna      |          |
|----|------------------|----------|--------------|----------|----------|----------|
|    | Mean             | Standard | Mean         | Standard | Mean     | Standard |
| 3  | 80.27736         | 1.18159  | 83.43272     | 1.75084  | 55.11507 | 0.37378  |
| 4  | 94.45647         | 1.18159  | 91.66368     | 1.07088  | 82.19145 | 0.42189  |
| 5  | 98.86774         | 1.1168   | 98.43707     | 1.43213  | 99.72037 | 0.24358  |
| 6  | 66.33458         | 1.25048  | 65.42751     | 0.53544  | 78.33363 | 1.52785  |
| 7  | 61.9233          | 0.89469  | 59.68299     | 0.82684  | 37.00597 | 2.53368  |
| 8  | 45.93242         | 0.49194  | 43.4783      | 1.07088  | 32.85916 | 1.49124  |
| 9  | 43.41169         | 0.85206  | 38.41969     | 0.82684  | 15.00567 | 0.26611  |
| 10 | 35.29809         | 1.18944  | 32.84665     | 0.77165  | 3.77956  | 1.41015  |

**Table S3. Storage stability parameters for free and immobilised enzymes**

| d  | Asp@ZIF-ZnCo-Sna |          | ZIF-ZnCo-Sna |          | Sna      |          |
|----|------------------|----------|--------------|----------|----------|----------|
|    | Mean             | Standard | Mean         | Standard | Mean     | Standard |
| 0  | 99.5227          | 0.30415  | 100.0469     | 0.39473  | 99.01538 | 0.9988   |
| 5  | 101.0644         | 1.02286  | 98.47277     | 0.35366  | 96.2243  | 2.31236  |
| 10 | 98.89455         | 0.60798  | 98.87604     | 0.88431  | 88.74098 | 0.4425   |
| 15 | 95.6316          | 0.92928  | 97.21963     | 1.10343  | 78.4974  | 0.46064  |
| 20 | 92.1181          | 0.78223  | 94.96882     | 0.84318  | 73.81998 | 0.15782  |
| 25 | 91.23481         | 1.05231  | 94.47832     | 1.37499  | 62.563   | 0.61821  |
| 30 | 92.64263         | 1.05869  | 88.05311     | 0.99282  | 57.82971 | 0.77178  |

**Table S4. Cycle stability enzyme activity parameters for immobilised enzymes**

| Cycle | Asp@ZIF-ZnCo-Sna |          | ZIF-ZnCo-Sna |          |
|-------|------------------|----------|--------------|----------|
|       | Mean             | Standard | Mean         | Standard |
| 0     | 98.97517         | 0.98439  | 94.93445     | 1.61526  |
| 1     | 93.89843         | 1.50462  | 90.0414      | 1.22157  |
| 2     | 92.79064         | 1.68951  | 82.85569     | 1.86055  |
| 3     | 79.36836         | 1.56082  | 71.86599     | 2.04349  |
| 4     | 62.3981          | 1.95396  | 51.72525     | 2.04841  |
| 5     | 62.67735         | 3.46902  | 39.92965     | 1.78307  |
| 6     | 51.61065         | 2.59215  | 37.7977      | 1.78824  |

**Table S5. Snailase catalytic ginsenoside conversion parameters**

| Time(h) | Rb1   | Rd    | F2   | CK       |
|---------|-------|-------|------|----------|
| 12      | 10.55 | 12.31 | 1.79 | 50.82694 |
| 24      | 10.11 | 1.03  | 9.54 | 49.4792  |
| 36      | 3.99  | 0.92  | 3.95 | 55.96048 |
| 48      | 0.08  | 0.9   | 0.14 | 58.88427 |
| 60      | 0.07  | 0.07  | 0.8  | 59.33867 |
| 72      | 0.09  | 0.05  | 0.6  | 58.33867 |
| 84      | 0.06  | 0.06  | 0.8  | 58.84012 |
| 96      | 0.07  | 0.05  | 0.7  | 58.84012 |

**Table S6. ZIF-ZnCo-Sna catalytic ginsenoside conversion parameters**

| Time(h) | Rb1  | Rd   | F2    | CK    |
|---------|------|------|-------|-------|
| 12      | 2.35 | 8.95 | 14.97 | 30.95 |
| 24      | 2.71 | 7.43 | 17.36 | 32.1  |
| 36      | 2.74 | 5.2  | 19.95 | 35.45 |
| 48      | 2.43 | 0.9  | 23.41 | 47.53 |
| 60      | 2.29 | 0.09 | 27.34 | 53.07 |
| 72      | 2.36 | 1.05 | 14.46 | 59.88 |
| 84      | 2.62 | 2.06 | 14.21 | 62.85 |
| 96      | 2.53 | 1.01 | 14.27 | 61.3  |

**Table S7. Asp@ZIF-ZnCo-Sna catalytic ginsenoside conversion parameters**

| <b>Time(h)</b> | <b>Rb1</b> | <b>Rd</b> | <b>F2</b> | <b>CK</b> |
|----------------|------------|-----------|-----------|-----------|
| 12             | 5.82       | 10.21     | 9.32      | 35.27     |
| 24             | 3.92       | 9.99      | 18.63     | 36.1      |
| 36             | 3.68       | 6.3       | 22.56     | 39.33     |
| 48             | 2.43       | 0.16      | 29.41     | 47.53     |
| 60             | 2.21       | 0.05      | 30.34     | 53.07     |
| 72             | 2.51       | 0.08      | 19.07     | 69.2      |
| 84             | 2.32       | 0.08      | 19.21     | 62.85     |
| 96             | 2.25       | 0.07      | 20.27     | 61.3      |

**Table S8. Asp@ZIF-ZnCo-Sna cyclic catalytic ginsenoside conversion**

**parameters**

| <b>Time(h)</b> | <b>Rb1</b> | <b>Rd</b> | <b>F2</b> | <b>CK</b> |
|----------------|------------|-----------|-----------|-----------|
| 1              | 2.51       | 0.08      | 19.46     | 69.88     |
| 2              | 4.32       | 0.08      | 29.21     | 67.85     |
| 3              | 4.25       | 0.07      | 30.27     | 72.33     |
| 4              | 7.50       | 0.08      | 26.33     | 79.87     |
| 5              | 8.10       | 0.58      | 31.12     | 72.85     |
| 6              | 12.26      | 1.77      | 31.01     | 65.32     |
